# Supplementary material for: Sex differences in outcomes from mild traumatic brain injury eight years post-injury
Source: PubMed Central journal article supplement (PMC9140230; doi:10.1371/journal.pone.0269101), 2022-05-27
Supplement: pone.0269101.s005.pdf [file pone.0269101.s005.pdf]

***Reviewer Comments to the authors:***

Dear authors,

thank you very much for your immense work and effort that have improved your manuscript significantly. However, I have minor suggestions that would help to improve the manuscript further:

- Please provide another orthographic check
- Please double check some wording and grammar by another scientific English native proofread
- I suggest adapting the last part of the abstract and the conclusion by being as specific and congruent in terms of the key results and messages.
- I suggest differing between single mTBI and repetitive mTBI throughout the manuscript

*Thank you very much for your effort.*
